# Supplementary material
Source: PubMed Central journal article supplement (PMC4644645)
Supplement: AEM.02782-15_zam999116771so1.pdf [file AEM.02782-15_zam999116771so1.pdf]

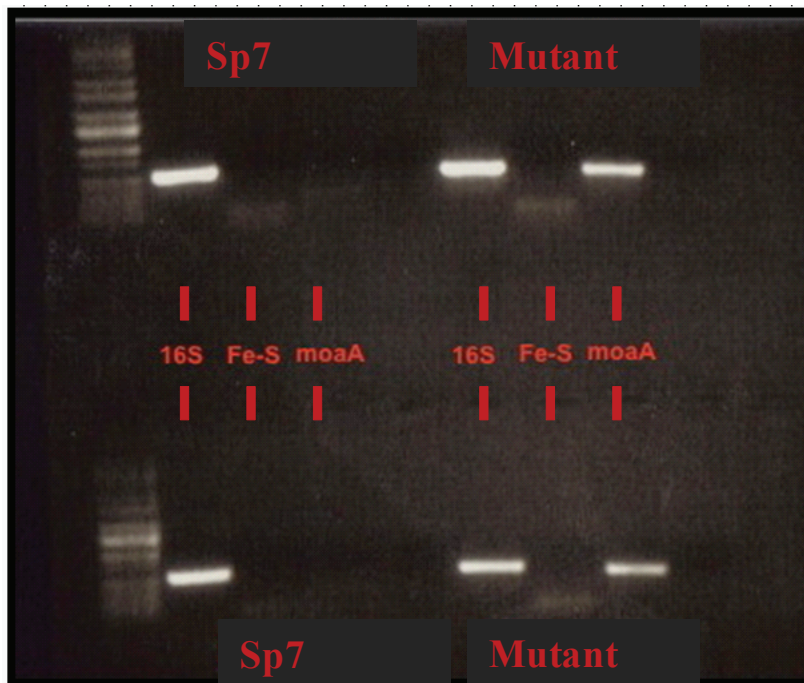

Fig. S1. RT-PCR analysis of the expression of the genes located upstream (Fe-S ferredoxin) and downstream (moaA) of the transposon insertion in the mutant strain (Mutant) compared to the wild type strain (Sp7). A: RT-PCR analysis from RNA extracted in logarithmic phase of growth; B: RT-PCR analysis from RNA extracted in logarithmic phase of growth.

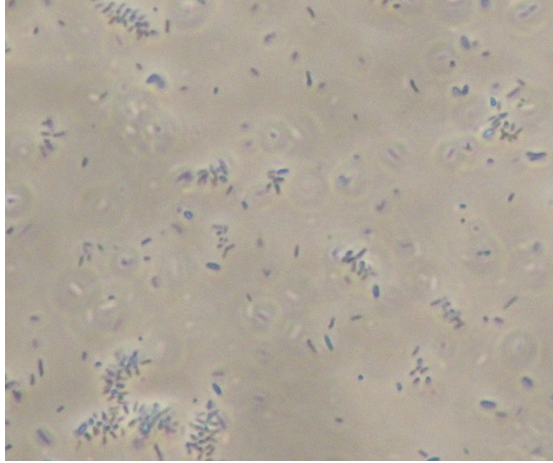

Fig. S2. Partial complementation of the transposon mutant affected in a putative mannosyltransferase. Large clumps of non-motile cells were observed throughout the culture, with the number of clumps increasing over time. However, no flocculation was observed.
